## स्वर्ग नहीं, बिल्क जेल

### कश्मीर की घेराबंदी के खिलाफ आवाज़ उठाएं

#### पिंजरा तोड़

सार अक्टूबर 2019 में, दिल्ली में महिला छात्राओं के लिए सुरक्षित, खिफायती एवं गैर-भेदभावपूर्ण आवास सुनिश्चित करने की ओर काम करने वाले महिला संगठन पिंजरा तोड़ ने अन्य छात्र संगठनों के साथ कश्मीर की लगातार घेराबंदी के खिलाफ दिल्ली विश्वविद्यालय के आर्ट्स फैकल्टी में एक संयुक्त विरोध और सार्वजनिक बैठक का आयोजन किया। संबधित पक्षों में पिंजरा तोड़ ने नरेंद्र मोदी के कश्मीर को "स्वर्ग" बनाने की कॉर्पोरेट योजनाओं और उनके पूंजीवादी एवं उग्र-राष्ट्रवादी पहलुओं पर सवाल उठाये। इसके अलावा, कश्मीर से निकलने वाली भयानक कहानियों पर चर्चा की: नाबालिगों और नौजवानों की हिरासत और यातना, मध्यरात्रि छापे और सेना बलों द्वारा महिलाओं के खिलाफ यौन हिंसा का निरंतर खतरा और धमकियां। आपातकाल की वर्तमान स्थिति को भारतीय राज्य द्वारा कश्मीर की जनता और उनके लोकतांत्रिक आकांक्षाओं के उत्पीड़न के एक लंबे और क्रूर इतिहास की निरंतरता के रूप में व्यक्त किया गया है। कश्मीरी लोगों के संघर्ष के समर्थन में, पिंजरा तोड़ ने तमाम मांगे प्रस्तुत की, जिसमें शामिल हैं: भारत के संविधान में अनुच्छेद 370 और 35A की पुनर्बहाली; किसी

भी नीतिगत निर्णय में कश्मीरी लोगों की लोकप्रिय भागीदारी सुनिश्चित की जाए; सभी राजनीतिक नेताओं, सामाजिक कार्यकर्ताओं, युवाओं और बच्चों को रिहा किया जाए; और सभी विश्वविद्यालयों में जिन कश्मीरी छात्रों की पढ़ाई बाधित हुई थी उनके लिए विशेष प्रावधान किए जाए।

**मुख्य शब्द** कश्मीर, भारतीय राज्य, विरोध, पिंजरा तोड़, दिल्ली विश्वविद्यालय

नरेंद्र मोदी ने हाल ही में हुई एक रैली में कहा, "हमें एक बार फिर से कश्मीर को स्वर्ग बनाना है।" किन्तु, दरअसल वे जिस स्वर्ग का निर्माण करना चाहते हैं, महज़ एक जेल है। कश्मीर में मोबाइल और इंटरनेट संचार पर बंदिश, कॉर्पोरेट और पूंजीवादी निवेश की योजनाएं, गैर-कश्मीरियों के लिए कश्मीर में ज़मीन खरीदने की "आज़ादी" का जश्न, और कश्मीरी महिलाओं से शादी करने की खुशी का ऐलान -- ये सब आरएसएस एवं मोदी-शाह सरकार की निर्दयी राष्ट्र-राज्य निर्माण परियोजना का हिस्सा है।

धरा 370 के हटाए जाने और जम्मू-कश्मीर राज्य के केंद्र-साथित प्रदेशों में विभाजन हुए तकरीबन तीन महीने गुज़र चुके हैं। भारत की मुख्यभूमि में बैठे लोग कश्मीरी जनता की चीखों, उन पर ज़िन्दगी-भर चली ज़्यादतियों के किस्सों को अनसुना कर देते हैं। कर्पूर्यू, डिटेंशन, सेना के क्रूर व्यवहार और दशकों से चलती आ रही हिंसा ने लोगों में सिर्फ़ आक्रोश और दर्द भरा है।

भारत सरकार जोर-शोर से घोषणा करती है, कि कश्मीर में "सब कुछ सामान्य है" और "हिंसा कम हो गई है"। भारत की अधिकांश मीडिया मोदी-शाह शासन के नियंत्रण में है, और उनके लिए एक प्रचार मशीन के रूप

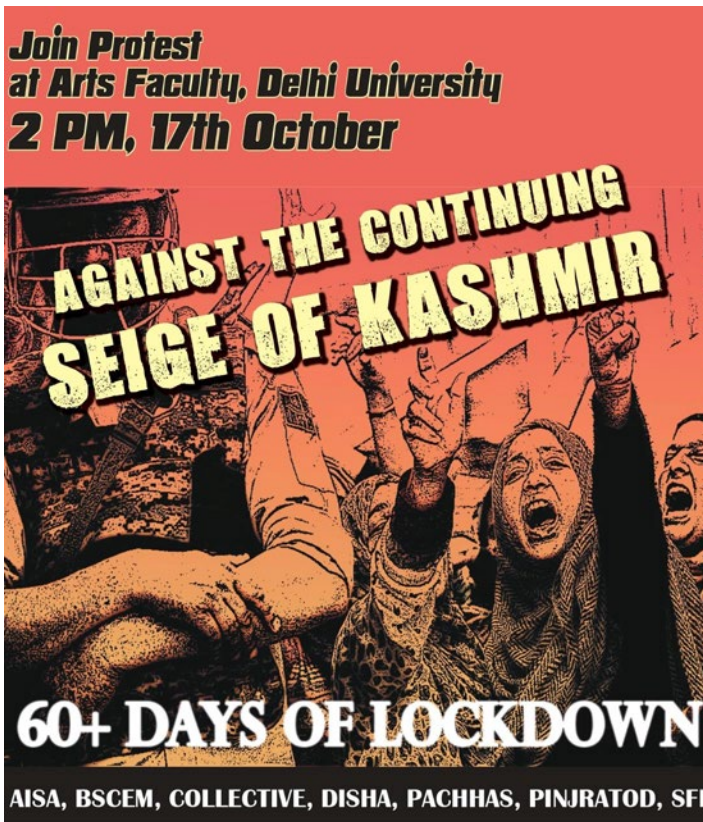

चित्र 1. अक्टूबर 2019 में, दिल्ली में महिला छात्राओं के लिए सुरक्षित, सिफयती एवं गैर-भेदभावपूर्ण आवास सुनिश्चित करने की ओर काम करने वाले महिला संगठन पिंजरा तोड़ ने अन्य छात्र संगठनों के साथ कश्मीर की लगातार घेराबंदी के खिलाफ दिल्ली विश्वविद्यालय के आर्ट्स फैकल्टी में एक संयुक्त विरोध और सार्वजनिक बैठक का आयोजन किया।

में काम कर रही है। वे जानबूझकर राज्य के दमन और कश्मीर की घेराबंदी पर सारी जानकारी को ब्लैक-आउट कर रही है। कश्मीर में चले आ रहे मानवाधिकारों के उल्लंघनों (जो 370 के निरस्त होने के बाद से बढ़ते जा रहे हैं) पर अंतर्राष्ट्रीय मीडिया द्वारा पेश किये गए तथ्यों और ग्राउंड रिपोर्टों को सरकार ने अपनी मनमर्जी से गलत घोषित कर दिया है।

यह सरकार झूठ बेचने और अपने शासन के लिए सहमति बनाने में माहिर हैं। कश्मीर घाटी में लोगों की लोकतांत्रिक आकांक्षाओं के खिलाफ सैन्य बल की बढ़ती तैनाती ने एक बड़े पैमाने के प्रतिरोध आंदोलन को पैदा किया, जो 'हिंदू राष्ट्र' और 'अखंड भारत' की दमनकारी इच्छाओं का मज़बूती से सामना करता आ रहा है। यह राजकीय दमन के खिलाफ एक व्यापक प्रतिरोध है, जिसे भारतीय राज्य कुचल देना चाहता है।

भारतीय न्यायपालिका (जिनके पास कश्मीर-संबंधी याचिकाओं को सुनने का समय ही नहीं है) और संसद (जो 2/3 बहुमत के साथ धारा 370 के निरस्तीकरण का समर्थन करती है) ने सत्ताधारी ताकतों के राजनैतिक दबाव में आकर कश्मीर के मुद्दे पर अपनी असल विचारधारा को बेनकाब कर दिया है।

कश्मीर पर बनी हर एक तथ्य-रिपोर्ट कई डरावने सच सामने लाती है -- सेना द्वारा घरों से युवा लड़कों के अपहरण, गर्भवती महिलाओं का आपातकालीन चिकित्सा संसाधनों तक ना पहुँच पाना, भारतीय सेना द्वारा बलात्कार और उत्पीड़न का निरंतर भय, हिरासत और हत्या की कहानियाँ, सब इस देश की हवा में मिल चुके हैं।

बिगड़ता मानसिक स्वास्थ्य, शिक्षा की स्थिति, चिकित्सा संकट, रोज़गार का संकट, आर्थिक संकट -- भारतीय राज्य के हिंसक और निन्दनीय फैसलों ने कश्मीरी समाज को निरंतर, बहुस्तरीय आपातकाल की स्थिति में डाल रखा है। छात्रों को परीक्षाएँ देने की चिंता है, मजदूरों को घाटी को छोड़ना पड़ रहा है, खेत और पेड़ों पर उपज सड़ रही है, और बीमार लोगों को दवाओं से वंचित किया जा रहा है। भारतीय राज्य और सरकार ने वास्तविक रूप से कश्मीरी जनता को पतन की कगार पर धकेल दिया है।

हमारे कश्मीरी साथियों सहित दिल्ली और देश के अन्य विश्वविद्यालयों में पढ़ रहे तमाम कश्मीरी विद्यार्थियों ने अपार रोष और आघात अनुभव किया है। इन छात्र - छात्राओं को परिवारों और दोस्तों से बात करने या घर से समाचार पाने में असमर्थता, फीस देने और जीवन-यापन करने में कठिनाइयों, हॉस्टल और कॉलेजों में पुलिस दौरे और पूछ ताछ, एवं सहपाठियों और प्रोफेसर्सों के ताने और धमकियों का सामना करना पड़ रहा है।

हमारे पास भारतीय राज्य और उसके सभी समर्थकों के लिए एक स्पष्ट संदेश है - हम आपके हिंसक आकांक्षाओं में साझीदार नहीं हैं। हम कश्मीर के लोगों के आत्म-निर्णय (right to self determination) और गरिमापूर्ण जीवन और आजीविका के अधिकारों की लड़ाई में उनके साथ खड़े हैं। हम भारतीय राज्य द्वारा बनायीं गयी इस गृहयुद्ध की स्थिति के खिलाफ अपनी आवाज उठाते रहेंगे (चित्र 1)।

### हमारी माँगे है:

- 1) धारा 370 और 35 (ए) बहाल हों
- 2) जम्मू और कश्मीर राज्य के द्विभाजन को वापस लिया जाए
- 3) आगे किसी भी नीतिगत निर्णय में कश्मीरी लोगों की भागीदारी सुनिश्चित हो
- 4) कश्मीर में संचार के सभी चैनलों को तुरंत बहाल करो
- 5) सभी राजनीतिक नेताओं, सामाजिक कार्यकर्ताओं, युवाओं और बच्चों तुरंत रिहा हों
- 6) कश्मीरी लोगों की निरंतर हत्याओं और दमन के लिए जिम्मेदार सेना बलों के खिलाफ कार्यवाई हो
- 7) AFSPA (आर्म्ड फोर्स स्पेशल पावर ऐक्ट) निरस्त हो
- 8) जम्मू और कश्मीर क्षेत्र का सैन्यकरण खत्म करो
- 9) इस शैक्षणिक वर्ष में विश्वविद्यालयों में प्रवेश न ले पाने वाले सभी कश्मीरी छात्रों को विशेष प्रावधान मिले

पिंजरा तोड़ दिल्ली में एक महिला संगठन है जो महिला छात्रों के लिए सुरक्षित, खिफायती एवं गैर-भेदभावपूर्ण आवास सुनिश्चित करने की ओर काम करते हैं। पिंजरा तोड़ ने लिंग, वर्ग, जाति, धर्म एवं क्षमता के आधार पर सामाजिक भेद-भाव, यौन हिंसा के निवारण तंत्रों, विश्वविद्यालय के लोकतांत्रिक चरित्र के बचाव, और विश्वविद्यालय परिसरों में आक्रामक मर्दाना संस्कृतियों के विरोध जैसे कई मुद्दों पर आवाज़ उठाई है। पिंजरा तोड़ का गठन 2015 में नयी दिल्ली में हुआ था, और वे दिल्ली के विभिन्न कॉलेज एवं विश्वविद्यालयों में काम करते हैं। यह आंदोलन देश के लोकतांत्रिक महिला एवं छात्र आंदोलनों के लंबे इतिहास को अपनी विरासत मानते हुए, भारत में महिलाओं की शिक्षा की नींव-निर्माता सावित्रीबाई फुले और फातिमा शेख के जीवन और कार्यों से प्रेरणा लेते हुए आक करता है।

### नोट

1. *सम्पादकीय नोट* 1925 में स्थापित राष्ट्रीय स्वयंसेवक संघ (आरएसएस) को लेखक अरुंधति राय ने "सत्तारूढ़ भारतीय जनता पार्टी [भाजपा] की जननी" के रूप में वर्णित किया है। "इसके संस्थापक जर्मनी व इटली के फासीवाद से बहुत प्रभावित थे।" 2019 में अनुच्छेद 370 के उन्मूलन ने "कश्मीर को प्रभावी रूप से एक राज्य से केंद्र-साशित प्रदेश बना दिया है"; अनुच्छेद 35A के उन्मूलन ने "कश्मीरियों को अपने ही घर में खिदमतगार बना दिया है।" Arundhati Roy, "India: Intimations of an Ending. The Rise of Modi and the Hindu Far Right," नेशन, नवंबर

22, 2019, [www.thenation.com/article/archive/arundhati-roy-assam-modi](http://www.thenation.com/article/archive/arundhati-roy-assam-modi); Arundhati Roy, "It's Hard to Communicate the Scale and the Shape of This Shadow Taking India Over," डेमोक्रेसी नाउ, नवंबर 28, 2019, [www.democracynow.org/2019/11/28/arundhati\\_roy\\_it\\_s\\_hard\\_to](http://www.democracynow.org/2019/11/28/arundhati_roy_it_s_hard_to).
